# Supplementary material for: Magnetic-assisted preparation and performance control of Fe3O4/PVDF gradient magnetic composites
Source: Royal Society of Chemistry journal article supplement (doi:10.1039/d3ra08804a), 2024-01-01
Supplement: d3ra08804a1.pdf [file d3ra08804a1.pdf]

Table S1 The content of Fe, C, F, O and N elements, as well as the parameter  $R_{Fe/F}$ , in  $Fe_3O_4/PVDF$  magnetic composites prepared under different magnetic field strengths.

|        | A     |       |       |      |      |            | B     |       |       |      |       |            | C     |       |       |       |      |            |
|--------|-------|-------|-------|------|------|------------|-------|-------|-------|------|-------|------------|-------|-------|-------|-------|------|------------|
|        | Fe(%) | C(%)  | F(%)  | O(%) | N(%) | $R_{Fe/F}$ | Fe(%) | C(%)  | F(%)  | O(%) | N(%)  | $R_{Fe/F}$ | Fe(%) | C(%)  | F(%)  | O(%)  | N(%) | $R_{Fe/F}$ |
| 0.35 T | 20.06 | 27.92 | 43.02 | 4.27 | 4.73 | 0.466      | 20.39 | 34.76 | 22.70 | 9.69 | 12.46 | 0.898      | 18.19 | 49.34 | 17.69 | 8.76  | 6.03 | 1.028      |
| 0.5 T  | 15.53 | 28.10 | 41.11 | 5.64 | 9.63 | 0.378      | 26.87 | 27.43 | 34.14 | 6.53 | 5.04  | 0.787      | 35.92 | 22.62 | 24.83 | 9.91  | 6.73 | 1.447      |
| 0.8 T  | 15.57 | 30.6  | 46.34 | 5.05 | 2.43 | 0.336      | 15.33 | 30.9  | 47.91 | 4.43 | 1.5   | 0.32       | 27.88 | 41.96 | 10.88 | 10.71 | 8.57 | 2.563      |

Table S2 The content of Fe, C, F, O and N elements, as well as the parameter  $R_{Fe/F}$ , in  $Fe_3O_4/PVDF$  magnetic composites prepared under different magnet spacings.

|      | A     |       |       |      |      |            | B     |       |       |      |       |            | C     |       |       |       |      |            |
|------|-------|-------|-------|------|------|------------|-------|-------|-------|------|-------|------------|-------|-------|-------|-------|------|------------|
|      | Fe(%) | C(%)  | F(%)  | O(%) | N(%) | $R_{Fe/F}$ | Fe(%) | C(%)  | F(%)  | O(%) | N(%)  | $R_{Fe/F}$ | Fe(%) | C(%)  | F(%)  | O(%)  | N(%) | $R_{Fe/F}$ |
| 5 mm | 20.06 | 27.92 | 43.02 | 4.27 | 4.73 | 0.466      | 20.39 | 34.76 | 22.70 | 9.69 | 12.46 | 0.898      | 18.19 | 49.34 | 17.69 | 8.76  | 6.03 | 1.028      |
| 7 mm | 18.47 | 26.03 | 41.52 | 6.78 | 7.21 | 0.445      | 25.17 | 28.51 | 39.30 | 5.74 | 1.27  | 0.64       | 26.91 | 28.9  | 19.37 | 12.02 | 12.8 | 1.389      |
| 9 mm | 24.26 | 26.30 | 36.59 | 6.08 | 6.77 | 0.663      | 26.05 | 25.72 | 35.8  | 6.98 | 5.45  | 0.728      | 30.71 | 24.46 | 29.94 | 9.49  | 5.40 | 1.026      |

Table S3 The content of Fe, C, F, O and N elements, as well as the parameter  $R_{Fe/F}$ , in  $Fe_3O_4/PVDF$  magnetic composites prepared under different magnet movement speeds.

|          | A     |       |       |      |      |            | B     |       |       |      |       |            | C     |       |       |       |      |            |
|----------|-------|-------|-------|------|------|------------|-------|-------|-------|------|-------|------------|-------|-------|-------|-------|------|------------|
|          | Fe(%) | C(%)  | F(%)  | O(%) | N(%) | $R_{Fe/F}$ | Fe(%) | C(%)  | F(%)  | O(%) | N(%)  | $R_{Fe/F}$ | Fe(%) | C(%)  | F(%)  | O(%)  | N(%) | $R_{Fe/F}$ |
| 0.5 mm/s | 19.36 | 29.08 | 42.34 | 4.8  | 4.42 | 0.457      | 27.45 | 24.52 | 34.41 | 8.63 | 4.98  | 0.798      | 35.94 | 22.43 | 25.54 | 10.16 | 5.93 | 1.407      |
| 1.0 mm/s | 20.06 | 27.92 | 43.02 | 4.27 | 4.73 | 0.466      | 20.39 | 34.76 | 22.70 | 9.69 | 12.46 | 0.898      | 18.19 | 49.34 | 17.69 | 8.76  | 6.03 | 1.028      |

|          |       |       |       |      |      |       |       |       |       |      |      |       |       |       |       |      |      |       |
|----------|-------|-------|-------|------|------|-------|-------|-------|-------|------|------|-------|-------|-------|-------|------|------|-------|
| 1.5 mm/s | 21.75 | 28.82 | 40.38 | 5.66 | 3.38 | 0.539 | 27.10 | 24.40 | 34.28 | 7.30 | 6.91 | 0.791 | 33.16 | 25.26 | 28.25 | 8.08 | 5.25 | 1.174 |
|----------|-------|-------|-------|------|------|-------|-------|-------|-------|------|------|-------|-------|-------|-------|------|------|-------|

Table S4 The content of Fe, C, F, O and N elements, as well as the parameter  $R_{Fe/F}$ , in  $Fe_3O_4/PVDF$  magnetic composites prepared under different initial particle contents.

|     | A     |       |       |      |      |            | B     |       |       |      |       |            | C     |       |       |       |      |            |  |
|-----|-------|-------|-------|------|------|------------|-------|-------|-------|------|-------|------------|-------|-------|-------|-------|------|------------|--|
|     | Fe(%) | C(%)  | F(%)  | O(%) | N(%) | $R_{Fe/F}$ | Fe(%) | C(%)  | F(%)  | O(%) | N(%)  | $R_{Fe/F}$ | Fe(%) | C(%)  | F(%)  | O(%)  | N(%) | $R_{Fe/F}$ |  |
| 0.1 | 15.05 | 27.85 | 43.99 | 4.77 | 8.33 | 0.342      | 24.83 | 25.97 | 38.49 | 7.33 | 3.39  | 0.645      | 22.15 | 28.05 | 30.00 | 8.58  | 11.2 | 0.738      |  |
|     |       |       |       |      |      |            |       |       |       |      |       |            |       |       |       |       | 2    |            |  |
| 0.2 | 20.06 | 27.92 | 43.02 | 4.27 | 4.73 | 0.466      | 20.39 | 34.76 | 22.70 | 9.69 | 12.46 | 0.898      | 18.19 | 49.34 | 17.69 | 8.76  | 6.03 | 1.028      |  |
| 0.3 | 26.17 | 30.08 | 36.80 | 3.54 | 3.40 | 0.711      | 31.51 | 25.60 | 31.44 | 6.92 | 4.53  | 1.002      | 38.47 | 22.42 | 23.39 | 10.75 | 4.97 | 1.645      |  |
